# Supplementary material for: A molecular atlas of the developing ectoderm defines neural, neural crest, placode, and nonneural progenitor identity in vertebrates
Source: PLoS Biol. 2017 Oct 19;15(10):e2004045. doi: 10.1371/journal.pbio.2004045 (PMC5663519; doi:10.1371/journal.pbio.2004045)
Supplement: S3 Table — Genes expressed at a higher level in the whole embryo than in any ectoderm sample were filtered out. This would remove potential minor mesoderm contamination from neural plate and neural border posterior halves. (XLSX) [file pbio.2004045.s018.xlsx]

## Sheet: S3 Table-Filtered
S3 Table, genes filtered out based on low ectoderm specificity (for Treshold selection method of Differentially expressed genes only)
gene name [BLAST annotation]	HUGO translation	gene name [BLAST annotation]	HUGO translation
a2m.s[a2m(0.0)]	a2m	plod2-like.l[plod2(5e-62)]
acat1.1[acat1(0.0)]	acat1	pygm.s[pygm(0.0)]	pygm
actc1.s[actc1(0.0)]	actc1	rbm20.s[pdcd4(0.0)|rbm20(5e-164)]	rbm20
admp2.l	bmp2	rbm24.l[rbm24(4e-175)]	rbm24
aldh1a2.l[aldh1a2(2e-35)]	aldh1a2	sfrp1.l[sfrp1(0.0)]	sfrp1
aplnr.l	aplnr	shisa2.l[shisa2(0.0)]	shisa2
aplnr.s	aplnr	spib.l[spib(0.0)]	spib
apobec2.l[apobec2(0.0)]	apobec2	srl-like.l[srl(0.0)]	srl
bambi.l[bambi(0.0)]	bambi	srl-like.s[srl(3e-123)]	srl
bambi.s[bambi(0.0)]	bambi	szl.l[szl(0.0)]	sfrp2
cacng1.l	cacng1	szl.s[szl(9e-138)]	sfrp2
cacng1.s[cacng1(3e-145)]	cacng1	t.l[t(0.0)]	t
cdh11.l[cdh11(0.0)]	cdh11	t2.s[t2(2e-87)]	t
cer1.l	cer1	tcf15.l	tcf15
clmp.l[clmp(0.0)]	clmp	tmem116.s[tmem116(3e-168)]	tmem116
cmtm8-like.l		unc45b.s[unc45b(0.0)]	unc45b
col9a1.l[col9a1(0.0)]	col9a1	xelaev18000171m.g
cuff.10060		xelaev18000178m.g
cuff.10472		xelaev18000325m.g
cuff.11002		xelaev18000418m.g
cuff.11685		xelaev18000533m.g
cuff.11847		xelaev18000697m.g
cuff.11854		xelaev18000895m.g[hes7.2(0.0)]	hes7
cuff.12670		xelaev18001339m.g
cuff.13022		xelaev18001340m.g
cuff.13084		xelaev18001508m.g[ensxetg00000026755(0.0)]
cuff.13577		xelaev18002068m.g
cuff.13999		xelaev18002200m.g[atp2a1(0.0)]	atp2a1
cuff.14781		xelaev18002266m.g
cuff.15795		xelaev18002611m.g[itih3(3e-56)]
cuff.1921		xelaev18002612m.g[itih3(0.0)]	itih3
cuff.1935		xelaev18002771m.g
cuff.20094		xelaev18002950m.g
cuff.20501		xelaev18003069m.g
cuff.2217		xelaev18003284m.g
cuff.27101		xelaev18003341m.g[hmcn2(3e-71)]
cuff.27437[eps8l3(3e-36)]		xelaev18003356m.g[hmcn2(0.0)]	hmcn2
cuff.40		xelaev18003389m.g[atp2a1(2e-43)]
cuff.42249[t(3e-153)|t2(2e-93)]	t	xelaev18003990m.g
cuff.4314		xelaev18003991m.g
cuff.43933[xtr-mir-133b(6e-32)]		xelaev18004072m.g
cuff.46208		xelaev18004077m.g
cuff.46477[xtr-mir-133b(7e-32)]		xelaev18005356m.g
cuff.47914		xelaev18005974m.g
cuff.48556		xelaev18006002m.g
cuff.5027		xelaev18007613m.g[vegt(0.0)]	tbx6
cuff.50616[sept7(5e-57)]		xelaev18008693m.g
cuff.5122		xelaev18010507m.g[vegt(0.0)]	tbx6
cuff.5183		xelaev18013538m.g[ppp1r1a(0.0)]	ppp1r1a
cuff.53955		xelaev18013796m.g[gjb2(8e-69)]
cuff.5449		xelaev18014773m.g
cuff.5776		xelaev18016751m.g
cuff.60929		xelaev18016894m.g
cuff.61538		xelaev18018555m.g
cuff.6268		xelaev18021140m.g
cuff.8243		xelaev18021834m.g[prr5l(2e-56)]
cuff.8252		xelaev18024764m.g
cuff.8464		xelaev18024765m.g
cuff.8848		xelaev18025927m.g[frzb2(0.0)]	frzb
cuff.9456		xelaev18025951m.g[cidec(3e-52)]
cuff.9631		xelaev18026892m.g
cuff.9800		xelaev18026894m.g
des.1.l[des.1(0.0)]	des	xelaev18026940m.g
efemp2.l[efemp2(3e-119)]	efemp2	xelaev18026950m.g
emilin3.1[emilin3(0.0)]	emilin3	xelaev18027367m.g
emilin3.s[emilin3(0.0)]	emilin3	xelaev18027368m.g[znf451(1e-49)]
eomes.l[eomes(0.0)]	eomes	xelaev18027420m.g[chrd(0.0)]	chrd
flnc.s[flnc(0.0)]	flnc	xelaev18027421m.g[chrd(0.0)]	chrd
flrt3.l[flrt3(0.0)]	flrt3	xelaev18029538m.g[chrd(0.0)]	chrd
fn1.l[fn1(0.0)]	fn1	xelaev18031181m.g[blvra(0.0)]	blvra
foxa2.l[foxa2(0.0)]	foxa2	xelaev18031478m.g
foxc2.l[foxc2(9e-102)]	foxc2	xelaev18031480m.g
foxc2.s[foxc2(0.0)]	foxc2	xelaev18035105m.g
frzb.l[frzb(0.0)]	frzb	xelaev18035471m.g
gdf3.1[gdf3(0.0)]	gdf3	xelaev18036343m.g
gjb1.l[gjb1(0.0)]	gjb1	xelaev18036474m.g[kirrel2(4e-117)]	kirrel2
gpx3.s[gpx3(2e-105)]	gpx3	xelaev18036545m.g
grn.l[grn(5e-174)]	grn	xelaev18037263m.g
has2.l[has2(0.0)]	has2	xelaev18041895m.g
kpna7.l[kpna7(0.0)]	kpna7	xelaev18044793m.g
loc100144919.l[sult2b1(0.0)]	sult2b1	xelaev18045771m.g
loc100145149.l[xb-gene-5852427(0.0)]		xelaev18047398m.g
loc100485780.s[slc16a9(4e-35)]		xelaev18047972m.g[ensxetg00000006287(0.0)]
loc100487498.s[ripply2(0.0)]	ripply2	xetrov90000278m.s[ensxetg00000030294(5e-56)]
loc101731538-like.s		xetrov90014037m.l
loc733474.l[xb-gene-5947742(6e-179)]		xetrov90015528m.l[ensxetg00000032284(1e-73)]
loc733709.l[ensxetg00000011112(0.0)]		xetrov90021734m.s
menf.1-like.1.1		xetrov90022298m.l[mef2d(8e-112)]	mef2d
msgn1.l[msgn1(0.0)]	msgn1	xetrov90022298m.s[mef2d(4e-116)]	mef2d
msgn1.s[msgn1(0.0)]	msgn1	xetrov90024189m.l[tn3(1e-137)]
myf5.l[myf5(0.0)]	myf5	xetrov90024189m.s[tn3(7e-35)]
myf5.s[myf5(0.0)]	myf5	xetrov90024920m.l
myod1.l[myod1(8e-175)]	myod1
myod1.s[myod1(0.0)]	myod1
myos-like.s[ensxetg00000030651(0.0)]
pcdh8.2.l[pcdh8.2(0.0)]	pcdh8
pcdh8.2.s[pcdh8.2(0.0)]	pcdh8
